# Supplementary material for: Using Staphylococcus aureus Cas9 to Expand the Scope of Potential Gene Targets for Genome Editing in Soybean
Source: MDPI journal article supplement (doi:10.3390/ijms232112789), 2022-10-24
Supplement: s1 [file s1]

[illegible]

**Supplementary data S2. The sequences of SaCas9 and NLS used in this study.**

ATGGCC**CCAAAGAAGAAGAGAAAGGTC**GGTATTCTGGAGTCCCAGCAGCAAGAGAAACTACATCTCTGG  
GACTGGACATCGGAATCACCAGTGTGGGATACGGAATCATCGACTACGAGACAAGAGACGTGATCGATGC  
CGGAGTGAGACTGTTCAAAGAGGGCCAACTGGAAAACAACGAGGGAAAGGAGAAGTAAGAGAGGAGCCA  
GAAGGCTGAAGAGAAGAAGGAGACATAGAATCCAGAGAGTGAAGAAGCTGCTGTTTCGACTACAACCTGC  
TGACCGACCATAGTGAGCTGAGTGGAATCAACCCATACGAGGCCAGAGTGAAGGGACTGAGTCAGAAGC  
TGAGTGAGGAAGAGTTCTCTGCCGCCCTGCTGCATCTGGCCAAGAGAAGAGGAGTGCATAACGTGAACGA  
GGTGGAAGAGGACACCGGAAACGAGCTGTCCACCAAAGAGCAGATCAGTAGAAAACAGTAAGGCCCTGGA  
AGAGAAATACGTGGCCGAACCTGCAGCTGGAAAGACTGAAGAAAGACGGAGAAGTGAGAGGAAGTATCA  
ACAGATTCAAGACCAGTGACTACGTGAAAGAAGCCAAACAGCTGCTGAAGGTGCAGAAGGCCTACCATC  
AGCTGGACCAGAGTTTCATCGACACCTACATCGACCTGCTGGAAACCAGAAGAACCTACTATGAGGGACC  
TGGAGAGGGAAGTCCATTTCGGATGGAAGGACATCAAAGAATGGTACGAGATGCTGATGGGACATTGTACC  
TACTTCCCAGAGGAACTGAGAAGTGTGAAGTACGCCTACAACGCCGACCTGTACAACGCCCTGAACGACC  
TGAACAATCTCGTGATCACCAGGGACGAGAACGAGAAGCTGGAATATTACGAGAAGTTCCAGATCATCGA  
GAACGTGTTCAAGCAGAAGAAGAAGCCAAACCCTGAAGCAGATCGCCAAAGAAATCCTCGTGAACGAAGA  
GGATATTAAGGGATACAGAGTGACCAGTACCGGAAAGCCAGAGTTACCAACCTGAAGGTGTACCATGAC  
ATCAAGGACATTACCGCCAGAAAAGAGATTATTGAGAACGCCGAGCTGCTGGATCAGATTGCCAAGATCCT  
GACCATCTACCAGAGTAGTGAGGACATCCAGGAAGAACTGACCAATCTGAACTCCGAGCTGACCCAGGAA  
GAGATCGAGCAGATCTCTAATCTGAAGGGATATACCGGAACCCATAACCTGAGTCTGAAGGCCATCAACCT  
GATCCTGGACGAGCTGTGGCATACCAACGACAACCAGATCGCTATCTTCAACAGACTGAAGCTGGTGCCA  
AAGAAGGTGGACCTGTCCCAGCAGAAAAGAGATCCCAACCACCCTGGTGGACGACTTCATCCTGAGTCCAG  
TCGTGAAGAGAAGTTTCATCCAGAGTATCAAAGTGATCAACGCCATCATCAAGAAGTACGGACTGCCAAA  
CGACATCATTATCGAGCTGGCCAGAGAGAAGAACTCCAAGGACGCCAGAAAATGATCAACGAGATGCAG  
AAGAGAAACAGACAGACCAACGAGAGAATCGAGGAAATCATCAGAACCACCGGAAAAGAGAACGCCAA  
GTACCTGATCGAGAAGATCAAGCTGCATGACATGCAGGAAGGAAAGTGTCTGTACAGTCTGGAAGCCATC  
CCTCTGGAAGATCTGCTGAACAACCCATTCAACTATGAGGTGGACCATATCATCCCAAGAAGTGTGTCTT  
CGACAACAGTTTCAACAACAAGGTGCTCGTGAAGCAGGAAGAAAACAGTAAGAAGGGGAAACAGAACCC

CATTCCAGTACCTGAGTAGTAGTGACAGTAAGATCAGTTACGAAACCTTCAAGAAGCATATCCTGAATCTG  
GCCAAGGGAAAGGGAAGAATCAGTAAGACCAAGAAAGAGTATCTGCTGGAAGAAAGAGACATCAACAG  
GTTCTCCGTGCAGAAAGACTTCATCAACAGAAACCTGGTGGATACCAGATACGCCACCAGAGGACTGATG  
AACCTGCTGAGAAGTTACTTCAGAGTGAACAACCTGGACGTGAAAGTGAAAGTCCATCAATGGAGGATTCA  
CCAGTTTTCTGAGAAGAAAGTGGAAGTTTAAGAAAGAGAGAAACAAGGGTTACAAGCATCATGCCGAGG  
ACGCCCTGATCATTGCCAACGCCGATTTTCATCTTCAAAGAGTGGAAGAAACTGGACAAGGCCAAAAAAGT  
GATGGAAAACCAGATGTTTCGAGGAAAAGCAGGCCGAGAGTATGCCAGAGATCGAAACCGAGCAGGAGTA  
CAAAGAGATCTTCATCACCCACATCAGATCAAGCATATTAAGGACTTCAAGGACTACAAGTACAGTCATA  
GAGTGGACAAGAAGCCTAATAGAGAGCTGATTAACGACACCCTGTACTCCACCAGAAAGGACGACAAGG  
GAAACACCCTGATCGTGAACAATCTGAACGGACTGTACGACAAGGACAATGACAAGCTGAAAAAGCTGAT  
CAACAAGAGTCCAGAAAAGCTGCTGATGTACCATCATGACCCACAGACCTACCAGAAAAGTGAAGCTGATT  
ATGGAACAGTACGGAGACGAGAAGAATCCACTGTACAAGTACTACGAGGAAACCGGTAACCTACCTGACCA  
AGTACTCCAAAAAGGACAACGGACCAGTGATCAAGAAGATTAAGTATTACGGAAACAAACTGAACGCCCCA  
TCTGGACATCACCGACGACTACCCAAACAGTAGAAACAAGGTCGTGAAGCTGTCCCTGAAGCCATACAGA  
TTCGACGTGTACCTGGACAATGGAGTGTACAAGTTCGTGACCGTGAAGAATCTGGATGTGATCAAAAAAG  
AAAAGTACTACGAAGTGAATAGTAAGTGTTATGAGGAAGCTAAGAAGCTGAAGAAGATCAGTAACCAGGC  
CGAGTTTATCGCCTCCTTCTACAACAACGATCTGATCAAGATCAACGGAGAGCTGTATAGAGTGATCGGAG  
TGAACAACGACCTGCTGAACAGAATCGAAGTGAACATGATCGACATCACCTACAGAGAGTACCTGGAAAA  
CATGAACGACAAGAGGCCACCAAGGATCATTAAAGACAATCGCCTCCAAGACCCAGAGTATTAAGAAGTAC  
AGTACAGACATTCTGGGAAACCTGTATGAAGTGAATCTAAGAAGCATCCTCAGATCATCAAAAAGGGA  
AAAGGCCTGCTGCCACTAAAAAGGCCGGACAGGCAAAAAAGAAAAAGTAA

The sequence of SV40 NLS is indicated with the capital letter on a yellow background, and the sequence of nucleoplasmin NLS is indicated with the capital letter on a green background.

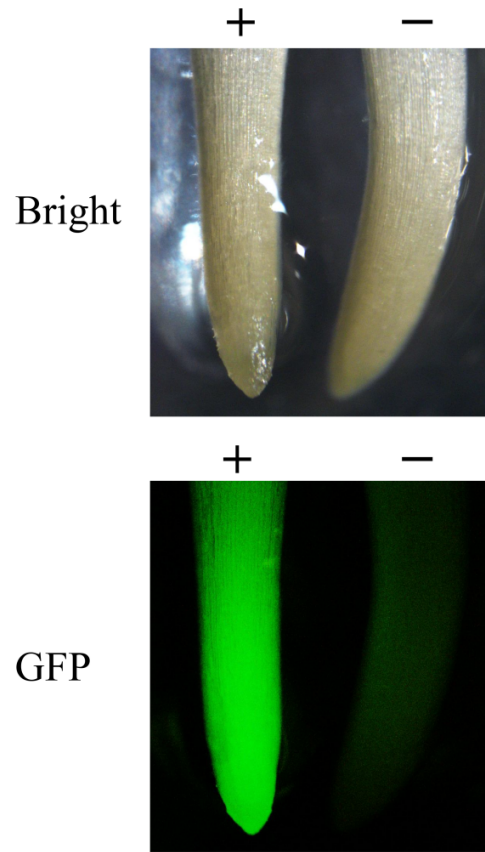

**Supplementary Figure S1.** Characterization of transgenic hairy roots with a GFP fluorescence labeling. +, transgenic hairy root. -, negative control.
